# Supplementary material for: Transposon age and non-CG methylation
Source: PubMed Central journal article supplement (PMC7060349; doi:10.1038/s41467-020-14995-6), 2020-03-06
Supplement: 41467_2020_14995_MOESM2_ESM.pdf [file 41467_2020_14995_MOESM2_ESM.pdf]

**Editorial Note:** This manuscript has been previously reviewed at another journal that is not operating a transparent peer review scheme. This document only contains reviewer comments and rebuttal letters for versions considered at Nature Communications.
