# Supplementary material for: Transposon age and non-CG methylation
Source: PubMed Central journal article supplement (PMC7060349; doi:10.1038/s41467-020-14995-6), 2020-03-06
Supplement: 41467_2020_14995_MOESM3_ESM.pdf [file 41467_2020_14995_MOESM3_ESM.pdf]

## **Description of Additional Supplementary Files**

File Name: Supplementary Data 1

Description: Differential expressed genes between WT and kyp.

File Name: Supplementary Data 2

Description: Differential expressed genes between WT and cmt3a.

File Name: Supplementary Data 3

Description: Primers used in this study.
